# Supplementary material for: Based on Transcriptome Sequencing: Clinicians Need to Pay Attention to Fever Caused by Common Respiratory Pathogens During the Global Outbreak of COVID-19
Source: Research Square preprint supplement (doi:10.21203/rs.3.rs-490705/v1), 2021-05-24
Supplement: Supplementary file 1 [file 63905bb5b897234ba84a9b9b.xlsx]

## Sheet: Sheet1
File number	Position	Ref	Alt	Dep	Freq
209001887R	1342	C	T	30	1
209001887R	28144	T	C	23	1
209001888R	4069	C	T	10	1
209001888R	28144	T	C	13	1
209001889R	22522	C	T	16	0.695652
209001889R	27925	C	T	23	1
209001889R	28377	C	T	86	0.988506
209001897R	28854	C	T	20	1
209001902R	24325	A	G	138	1
209001903R	520	G	T	10	0.909091
209001903R	5084	A	G	22	1
209001903R	8829	C	T	12	1
209001903R	11974	T	C	14	1
209001903R	28854	C	T	79	1
209001904R	26144	G	T	30	1
209001904R	26528	A	T	21	1
209001908R	174	G	T	29	1
209001908R	8782	C	T	23	1
209001908R	26113	G	C	17	1
209001908R	28144	T	C	18	1
209001908R	29095	C	T	45	1
209001909R	27925	C	T	38	0.974359
209001909R	28377	C	T	161	1
*Extract all mutation sites with a frequency above 90% and the site depth >=10X.
