# Supplementary material for: Based on Transcriptome Sequencing: Clinicians Need to Pay Attention to Fever Caused by Common Respiratory Pathogens During the Global Outbreak of COVID-19
Source: Research Square preprint supplement (doi:10.21203/rs.3.rs-490705/v1), 2021-05-24
Supplement: Supplementary file 2 [file 6d3dc12652a3487a89380e2d.xlsx]

## Sheet: Sheet1
File number	mapping reads	mapping ratio	group	Fastv
209001887R	952734	0.0807	Positive	Positive
209001888R	137689	0.0132	Positive	Positive
209001889R	63229	0.0113	Positive	Positive
209001890R	64929	0.0066	Negative	Negative
209001891R	8735	0.0016	Negative	Negative
209001892R	3459	0.0007	Negative	Negative
209001893R	187705	0.0198	Positive	Positive
209001894R	40076	0.0063	Negative	Negative
209001895R	2606	0.0003	Positive	Positive
209001896R	4777	0.0007	Negative	Negative
209001897R	44594	0.0043	Positive	Positive
209001898R	9855	0.0021	Positive	Positive
209001899R	5193	0.0021	Positive	Positive
209001900R	6907	0.003	Negative	Negative
209001901R	8762	0.003	Negative	Negative
209001902R	17558985	0.7847	Positive	Positive
209001903R	62798	0.0073	Positive	Positive
209001904R	468456	0.1038	Positive	Positive
209001905R	93735	0.0236	Positive	Positive
209001906R	231759	0.0457	Positive	Positive
209001907R	160083	0.0216	Negative	Negative
209001908R	549845	0.0888	Positive	Positive
209001909R	149103	0.0253	Positive	Positive
209001910R	1841445	0.1774	Positive	Positive
209001911R	77290	0.011	Negative	Negative
209001912R	9803	0.0034	Negative	Negative
