# Supplementary material for: Based on Transcriptome Sequencing: Clinicians Need to Pay Attention to Fever Caused by Common Respiratory Pathogens During the Global Outbreak of COVID-19
Source: Research Square preprint supplement (doi:10.21203/rs.3.rs-490705/v1), 2021-05-24
Supplement: Supplementary file 3 [file 8851bd4e32c968c76c3c0422.xlsx]

## Sheet: Sheet1
Period	Date	Total patients	Detection target	FluA		FluB		FluA & FluB
Before the epidemic	2019.8.1-8.16	107	Nucleic Acid	0	0	8	0.0747664	8	0.0747664
		1751	Protein**	91	0.0519703	60	0.0342661	151	0.0862364
During the epidemic	2020.1.23-2.1*	733	Nucleic Acid	38	0.0518417	54	0.0736698	92	0.125512
After the epidemic	2020.8.1-8.16	27	Nucleic Acid	0	0	0	0	0	0
